# Supplementary material for: Expert consensus guidelines on management and best practices for tumor-infiltrating lymphocyte cell therapy
Source: PubMed Central journal article supplement — J Immunother Cancer. 2024 Feb 29;12(2):e008735. doi: 10.1136/jitc-2023-008735 (PMC11005706; doi:10.1136/jitc-2023-008735), 2024-02-29
Supplement: jitc-2023-008735supp001.pdf [file jitc-2023-008735supp001.pdf]

**Supplement to:**

Allison Betof Warner, Omid Hamid, Krishna Komanduri, et al.

**Expert consensus guidelines on management and best practices for tumor-infiltrating lymphocyte (TIL) cell therapy**

|                                                                                                     |   |
|-----------------------------------------------------------------------------------------------------|---|
| Supplementary Table 1. Discharge considerations.....                                                | 2 |
| Supplementary Table 2. Patient selection considerations and pre-operative assessments.....          | 3 |
| Supplementary Table 3. Pre-non-myeloablative lymphodepletion checklist.....                         | 5 |
| Supplementary Table 4. “Cheat sheet” for management of TIL regimen and potential complications..... | 6 |
| Supplementary Figure 1. Steps in TIL cell therapy and patient journey.....                          | 8 |
| Supplementary Figure 2. Operational considerations for TIL cell therapy.....                        | 9 |

**Supplementary Table 1. Discharge considerations**

| <b>Parameters</b> | <b>Discharge criteria</b>                                                                          |
|-------------------|----------------------------------------------------------------------------------------------------|
| ANC               | >500 cells/mm <sup>3</sup> or trending to >500 cells/mm <sup>3</sup> in next 24 hours              |
| Temperature       | Afebrile for 24 hours after stopping IV antibiotics and fluconazole (~7–10 days post TIL infusion) |
| Pulmonary status  | Return to baseline or near baseline prior to treatment after diuresis                              |

ANC, absolute neutrophil count; IV, intravenous.

Supplementary Table 2. Patient selection considerations and pre-operative assessments

| System                        | Eligible                                                                                                                                                                                                                                                                                                                                                                                                                                                                                                                                                                          | Contraindications*                                                                                                                                                                                                                                                                                                                                                                                                                                               | Assessments                                                                                                                                                                                                                                                                                                                                                                                                                                                                                                                                                       |
|-------------------------------|-----------------------------------------------------------------------------------------------------------------------------------------------------------------------------------------------------------------------------------------------------------------------------------------------------------------------------------------------------------------------------------------------------------------------------------------------------------------------------------------------------------------------------------------------------------------------------------|------------------------------------------------------------------------------------------------------------------------------------------------------------------------------------------------------------------------------------------------------------------------------------------------------------------------------------------------------------------------------------------------------------------------------------------------------------------|-------------------------------------------------------------------------------------------------------------------------------------------------------------------------------------------------------------------------------------------------------------------------------------------------------------------------------------------------------------------------------------------------------------------------------------------------------------------------------------------------------------------------------------------------------------------|
| <b>General</b>                | <ul style="list-style-type: none"> <li>• Unresectable or metastatic disease</li> <li>• Age <math>\geq 18</math> years</li> <li>• ECOG PS 0 or 1</li> <li>• Estimated life expectancy <math>\geq 3</math> months</li> </ul>                                                                                                                                                                                                                                                                                                                                                        | <ul style="list-style-type: none"> <li>• Generally avoid in cases of rapidly progressive disease</li> <li>• History of hypersensitivity to any component or excipient of the regimen</li> <li>• Chronic steroid therapy <math>&gt;10</math> mg of prednisone (or equivalent) for any reason</li> </ul>                                                                                                                                                           | <ul style="list-style-type: none"> <li>• Height (only at screening), weight</li> <li>• Examination of extremities, head, eyes, ears, nose, and throat, dermatological, musculoskeletal, and psychiatric (mental status)</li> <li>• BMI and BSA</li> <li>• Temperature</li> <li>• CT scan of chest, abdomen, pelvis, and additional anatomic regions (eg, extremities, neck) per disease history and clinical symptoms</li> <li>• High-resolution CT with PO/IV contrast or contrast-enhanced MRI for assessing radiographic tumor response<sup>†</sup></li> </ul> |
| <b>Cardio-vascular</b>        | <ul style="list-style-type: none"> <li>• LVEF <math>&gt;45\%</math> or NYHA Class <math>&lt;1</math></li> <li>• Patients <math>\geq 60</math> years of age with history of ischemic heart disease, angina, or clinically significant atrial and/or ventricular arrhythmias must have a cardiac stress test</li> <li>• Cardiology consult in patients with abnormal cardiovascular function</li> </ul>                                                                                                                                                                             |                                                                                                                                                                                                                                                                                                                                                                                                                                                                  | <ul style="list-style-type: none"> <li>• Cardiovascular examination, pulse rate, blood pressure</li> </ul>                                                                                                                                                                                                                                                                                                                                                                                                                                                        |
| <b>Pulmonary</b>              | <ul style="list-style-type: none"> <li>• FEV<sub>1</sub> <math>&gt;50\%</math> of predicted normal or FEV<sub>1</sub>/FVC <math>&gt;70\%</math> of normal</li> <li>• Not requiring continuous O<sub>2</sub> supplementation at BL</li> <li>• Screening PFT for: <ul style="list-style-type: none"> <li>– Cigarette smoking <math>\geq 20</math> pack-years</li> <li>– Ceased smoking within past 2 y or still smoking</li> <li>– Significant respiratory dysfunction</li> <li>– History of COPD or asthma</li> <li>– Pleural drainage within the last 3 mo</li> </ul> </li> </ul> | <ul style="list-style-type: none"> <li>• Documented FEV<sub>1</sub> <math>\leq 60\%</math></li> <li>• Patients who are unable to walk a distance of at least 80% predicted for age and sex or who demonstrate evidence of hypoxia at any point during the 6-minute walk test (SpO<sub>2</sub> <math>&lt;90\%</math>)</li> <li>• Patients with moderate to severe lung impairment (DLCO <math>&lt;50\%</math> and <math>&lt;40\%</math>, respectively)</li> </ul> | <ul style="list-style-type: none"> <li>• Respiratory system examination</li> <li>• Respiratory rate</li> <li>• Pulse oximetry during IL-2 administration</li> </ul>                                                                                                                                                                                                                                                                                                                                                                                               |
| <b>Central nervous system</b> | <ul style="list-style-type: none"> <li>• No brain metastases on MRI imaging</li> <li>• Patients with definitively treated brain metastases must be stable by MRI imaging for <math>\geq 14</math> days prior to beginning the non-myeloablative lymphodepletion preconditioning regimen</li> </ul>                                                                                                                                                                                                                                                                                | <ul style="list-style-type: none"> <li>• Untreated brain metastases</li> </ul>                                                                                                                                                                                                                                                                                                                                                                                   | <ul style="list-style-type: none"> <li>• Neurological examination</li> <li>• MRI of the brain if positive for central nervous system involvement at screening or baseline, or as clinically indicated</li> </ul>                                                                                                                                                                                                                                                                                                                                                  |
| <b>Gastro-intestinal</b>      | <ul style="list-style-type: none"> <li>• SGPT and SGOT <math>\leq 3</math> times ULN (<math>\leq 5</math> times ULN in patients with liver metastasis)</li> <li>• Total bilirubin <math>\leq 2</math> mg/dL (<math>\leq 3</math> mg/dL for patients with Gilbert syndrome)</li> <li>• Patients with acute/chronic hepatitis infections may be enrolled if the viral load by PCR is undetectable with/without active treatment</li> </ul>                                                                                                                                          |                                                                                                                                                                                                                                                                                                                                                                                                                                                                  | <ul style="list-style-type: none"> <li>• Gastrointestinal (abdomen, liver) examination</li> <li>• Serum alkaline phosphatase, SGPT, SGOT, total bilirubin, direct bilirubin, LDH, total protein</li> </ul>                                                                                                                                                                                                                                                                                                                                                        |
| <b>Renal</b>                  | <ul style="list-style-type: none"> <li>• Estimated creatinine clearance <math>&gt;60</math> mL/min using the Cockcroft-Gault formula</li> <li>• Estimated creatinine clearance <math>\geq 40</math>-60 mL/min using the Cockcroft-Gault formula with dose reduction/avoidance of nephrotoxic agents</li> </ul>                                                                                                                                                                                                                                                                    | <ul style="list-style-type: none"> <li>• Creatinine clearance <math>&lt;40</math> mL/min</li> </ul>                                                                                                                                                                                                                                                                                                                                                              | <ul style="list-style-type: none"> <li>• BUN, creatinine, sodium, potassium, chloride, total CO<sub>2</sub> or bicarbonate</li> </ul>                                                                                                                                                                                                                                                                                                                                                                                                                             |

|                                 |                                                                                                                                                                                                                                                                                                                                                                |                                                                                                                                                                                                                                                                                                                                                                                                                                           |                                                                                                                                                                                                                                                                                                                                             |
|---------------------------------|----------------------------------------------------------------------------------------------------------------------------------------------------------------------------------------------------------------------------------------------------------------------------------------------------------------------------------------------------------------|-------------------------------------------------------------------------------------------------------------------------------------------------------------------------------------------------------------------------------------------------------------------------------------------------------------------------------------------------------------------------------------------------------------------------------------------|---------------------------------------------------------------------------------------------------------------------------------------------------------------------------------------------------------------------------------------------------------------------------------------------------------------------------------------------|
| <b>Hemato-logic</b>             | <ul style="list-style-type: none"> <li>ANC <math>\geq 1000/\text{mm}^3</math></li> <li>Hemoglobin <math>\geq 8.0</math> g/dL</li> <li>Platelets <math>\geq 100,000/\text{mm}^3</math></li> </ul>                                                                                                                                                               | <ul style="list-style-type: none"> <li>Patients requiring transfusions or growth factor support to meet parameters should undergo investigation to assess etiology and reversible causes should be addressed prior to consideration of TIL therapy regimen.</li> </ul>                                                                                                                                                                    | <ul style="list-style-type: none"> <li>CBC with differentials, when available: WBC count with differentials (neutrophils, lymphocytes, monocytes, eosinophils, and basophils), RBC count, hemoglobin, hematocrit, MCV, MCH, platelet count</li> <li>INR and PT or INR and aPTT</li> </ul>                                                   |
| <b>Immune-related</b>           | <ul style="list-style-type: none"> <li>No active autoimmune or checkpoint inhibitor induced immune-related adverse events requiring <math>&gt;10</math> mg of prednisone (or prednisone equivalent)</li> </ul>                                                                                                                                                 | <ul style="list-style-type: none"> <li>Active uveitis that requires treatment</li> </ul>                                                                                                                                                                                                                                                                                                                                                  | <ul style="list-style-type: none"> <li>If history of uveitis, need eye exam to rule out active uveitis requiring treatment)</li> </ul>                                                                                                                                                                                                      |
| <b>Infections</b>               |                                                                                                                                                                                                                                                                                                                                                                | <ul style="list-style-type: none"> <li>Active systemic infections requiring systemic antibiotics</li> </ul>                                                                                                                                                                                                                                                                                                                               | <ul style="list-style-type: none"> <li>Human immunodeficiency virus (HIV-1 and HIV-2) antibody titer</li> <li>HbsAg, anti-HBc, HCV-Ab</li> <li>Syphilis (RPR or VDRL)</li> <li>HSV-1, and HSV-2 IgM serology or PCR assay</li> <li>CMV antibody titer, including IgM or PCR assay</li> <li>EBV panel, including IgM or PCR assay</li> </ul> |
| <b>Genito-urinary</b>           | <ul style="list-style-type: none"> <li>Patients of childbearing potential or their partners willing to take precautions to avoid pregnancy during treatment and for 12 months after receiving the treatment regimen</li> </ul>                                                                                                                                 | <ul style="list-style-type: none"> <li>Patients who are pregnant or breastfeeding</li> </ul>                                                                                                                                                                                                                                                                                                                                              |                                                                                                                                                                                                                                                                                                                                             |
| <b>Endocrine</b>                | <ul style="list-style-type: none"> <li>Patients with immunotherapy-related endocrinopathies stable for at least 6 weeks (eg, hypothyroidism), and controlled with hormonal replacement (non-corticosteroids)</li> <li>Adrenal insufficiency requiring 10 mg of prednisone (or equivalent) or less</li> </ul>                                                   |                                                                                                                                                                                                                                                                                                                                                                                                                                           | <ul style="list-style-type: none"> <li>Blood glucose</li> <li>TSH and free T<sub>4</sub></li> </ul>                                                                                                                                                                                                                                         |
| <b>Others</b>                   |                                                                                                                                                                                                                                                                                                                                                                | <ul style="list-style-type: none"> <li>Coagulation disorders</li> <li>Major illnesses of the immune system</li> <li>Seropositive for HIV-1 or -2 antibodies; HbsAg, anti-HBc, or HCV Ab; syphilis; CMV and EBV; HSV-1 and -2</li> <li>Primary immunodeficiency, such as SCID and AIDS</li> <li>Received a live or attenuated vaccine within 28 days of beginning the non-myeloablative lymphodepleting preconditioning regimen</li> </ul> | <ul style="list-style-type: none"> <li>Serum albumin, calcium total, magnesium total, phosphorus, total creatine kinase, and uric acid</li> </ul>                                                                                                                                                                                           |
| <b>Tumor resection criteria</b> | <ul style="list-style-type: none"> <li>At least 1 resectable lesion (or aggregate of lesions resected) of a minimum 1.5 cm and less than 4 cm in diameter post-resection to generate TIL</li> <li>Surgical tissue removal possible with minimal morbidity (defined as any procedure for which expected hospitalization is <math>\leq 3</math> days)</li> </ul> | <ul style="list-style-type: none"> <li><math>\geq</math> Grade 2 hemorrhage within 14 days prior to enrollment</li> </ul>                                                                                                                                                                                                                                                                                                                 |                                                                                                                                                                                                                                                                                                                                             |

\*Some of these contraindications are under active investigation and may be modified pending trial results.

<sup>†</sup>If a patient has a known allergy to CT contrast material, alternate modality to be used. In cases where contrast is strictly contraindicated, a non-contrast scan will suffice.

ANC, absolute neutrophil count; aPTT, activated partial thromboplastin time; BL, baseline; BMI, body mass index; BUN, blood urea nitrogen; BSA, body surface area; CBC, complete blood count; CMV, cytomegalovirus; COPD, chronic obstructive pulmonary disease; CT, computed tomography; DLCO, diffusing lung capacity for carbon monoxide; EBV, Epstein-Barr virus; ECOG PS, Eastern Cooperative Oncology Group performance status; FEV<sub>1</sub>, forced expiratory volume in 1 second; FVC, forced vital capacity; HBc, hepatitis B core antigen; HbsAg, hepatitis B surface antigen; HCV Ab, hepatitis C antibody; HSV, herpes simplex virus; ICI, immune checkpoint inhibitor; IL-2, interleukin-2; INR, international normalized ratio; IV, intravenous; LDH, lactate dehydrogenase; LVEF, left ventricular ejection fraction; MCH, mean corpuscular hemoglobin; MCV, mean corpuscular volume; MRI, magnetic resonance imaging; NYHA, New York Heart Association; PCR, polymerase chain reaction; PFT, pulmonary function test; PO, per oral (by mouth); PT, prothrombin time; RBC, red blood cell; RECIST, Response Evaluation Criteria in Solid Tumors; RPR, rapid plasma reagin; SCID, severe combined immunodeficiency; SGOT, serum glutamic oxaloacetic transaminase; SGPT, serum glutamate pyruvate transaminase; SpO<sub>2</sub>, oxygen saturation; T<sub>4</sub>, thyroxine; TIL, tumor-infiltrating lymphocyte; TSH, thyroid-stimulating hormone; ULN, upper limit of normal; VDRL, Venereal Disease Research Laboratory; WBC, white blood cell.

**Supplement Table 3. Pre-non-myeloablative lymphodepletion checklist**

|                                             |                                                                                                                                                                                                                                                                                                                                                                                                                                                                                                                                                                                                                         |
|---------------------------------------------|-------------------------------------------------------------------------------------------------------------------------------------------------------------------------------------------------------------------------------------------------------------------------------------------------------------------------------------------------------------------------------------------------------------------------------------------------------------------------------------------------------------------------------------------------------------------------------------------------------------------------|
| <b>Verification of TIL production</b>       | <ul style="list-style-type: none"> <li>• Verification of sufficient TIL production from the manufacturer prior to beginning non-myeloablative lymphodepletion</li> </ul>                                                                                                                                                                                                                                                                                                                                                                                                                                                |
| <b>Physical examination</b>                 | <ul style="list-style-type: none"> <li>• Weight</li> <li>• ECOG PS evaluation</li> <li>• Gastrointestinal; cardiovascular; extremities; head; eyes, ears, nose, and throat; respiratory system; dermatological; musculoskeletal; neurological; and psychiatric examinations</li> </ul>                                                                                                                                                                                                                                                                                                                                  |
| <b>Vital signs</b>                          | <ul style="list-style-type: none"> <li>• Pulse rate, pulse oximetry, respiratory rate, blood pressure, and temperature</li> </ul>                                                                                                                                                                                                                                                                                                                                                                                                                                                                                       |
| <b>Blood and urine tests</b>                | <ul style="list-style-type: none"> <li>• Seronegative for HSV IgM or PCR assay</li> <li>• Hematology: CBC with differentials, WBC with differentials, RBC counts, hemoglobin, hematocrit, MCV, MCH, platelet count</li> <li>• Blood chemistry: Sodium, potassium, chloride, total carbon dioxide or bicarbonate, creatinine, glucose, BUN, albumin, calcium total, magnesium total, phosphorus, alkaline phosphatase, ALT/SGPT, AST/SGOT, total bilirubin, direct bilirubin, LDH, total protein, total creatine kinase, and uric acid</li> <li>• Serum pregnancy test for patients of childbearing potential</li> </ul> |
| <b>Antibiotic and antiviral prophylaxis</b> | <ul style="list-style-type: none"> <li>• Antibiotic prophylaxis: Levofloxacin/ciprofloxacin 500 mg orally daily or equivalent, until ANC &gt;500mm<sup>3</sup></li> <li>• Pneumocystis prophylaxis: Trimethoprim-sulfamethoxazole 1 single/double strength tablet orally three times per week (or alternative) started along with chemotherapy</li> <li>• Antiviral: Acyclovir 400 mg or valacyclovir 500 mg BID orally (or alternative) started along with chemotherapy</li> </ul>                                                                                                                                     |
| <b>CVC/PICC line</b>                        | <ul style="list-style-type: none"> <li>• Dual or triple lumen large bore tunneled CVC/PICC line</li> </ul>                                                                                                                                                                                                                                                                                                                                                                                                                                                                                                              |

ALT, alanine aminotransferase; ANC, absolute neutrophil count; AST, aspartate aminotransferase; BID, twice daily; BUN, blood urea nitrogen; CBC, complete blood count; CVC, central venous catheter; ECOG PS, Eastern Cooperative Oncology Group performance status; HSV, herpes simplex virus; LDH, lactate dehydrogenase; MCH, mean corpuscular hemoglobin; MCV, mean corpuscular volume; PCR, polymerase chain reaction; PICC, peripherally inserted central catheter; RBC, red blood cell; SGOT, serum glutamic oxaloacetic transaminase; SGPT, serum glutamate pyruvate transaminase; TIL, tumor-infiltrating lymphocyte; WBC, white blood cell.

Supplementary Table 4. “Cheat sheet” for management of TIL regimen and potential complications

|                                                                                        | IL-2 infusion                                                                                                                                                                                                                                                                                                                                                                                                                                                                                                                                                                                                                                                                                         | TIL Cell therapy infusion                                                                                                                                                                                                                                                                                                                                                                                                                                                                                                                                                     | Non-myeloablative lymphodepletion                                                                                                                                                                                                                                                                                                                                                                                                                                                                                                                                                                                                                                                                                                                                                                                                                             |
|----------------------------------------------------------------------------------------|-------------------------------------------------------------------------------------------------------------------------------------------------------------------------------------------------------------------------------------------------------------------------------------------------------------------------------------------------------------------------------------------------------------------------------------------------------------------------------------------------------------------------------------------------------------------------------------------------------------------------------------------------------------------------------------------------------|-------------------------------------------------------------------------------------------------------------------------------------------------------------------------------------------------------------------------------------------------------------------------------------------------------------------------------------------------------------------------------------------------------------------------------------------------------------------------------------------------------------------------------------------------------------------------------|---------------------------------------------------------------------------------------------------------------------------------------------------------------------------------------------------------------------------------------------------------------------------------------------------------------------------------------------------------------------------------------------------------------------------------------------------------------------------------------------------------------------------------------------------------------------------------------------------------------------------------------------------------------------------------------------------------------------------------------------------------------------------------------------------------------------------------------------------------------|
| T<br>H<br>E<br>R<br>A<br>P<br>Y<br>P<br>R<br>E<br>P<br>A<br>R<br>A<br>T<br>I<br>O<br>N | Supportive therapy prior to IL-2 administration:<br>- <b>Acetaminophen</b> every 4–6 hours<br>- <b>Indomethacin</b> OR other <b>NSAID</b><br>- <b>Pantoprazole</b> 40 mg PO/IV daily or <b>famotidine</b> 20mg PO/IV BID (or equivalent)<br>- <b>Antiemetics</b><br><b>Antihypertensive</b> medications should be discontinued 24 hours prior to IL-2 administration<br>If a dose is held, can cautiously consider dosing at the next scheduled dose if the patient has recovered fully<br>- If 2 consecutive doses are held, discontinue IL-2 permanently<br>Once IL-2 is completed/discontinued, <b>NSAIDs</b> , <b>meperidine</b> , and other related medications should be stopped 12 hours later | Premedication:<br>- Acetaminophen or equivalent<br>- Diphenhydramine or another H1-histamine antagonist<br><b>Corticosteroids</b> should be used only to treat <b>immediate life-threatening conditions</b><br>- Steroids could diminish the efficacy of TIL cell therapy<br>Cryopreserved TIL infusion products require thawing according to the manufacturer’s specification prior to infusion<br>TIL infusion should be initiated approximately 24 hours after completion of non-myeloablative lymphodepletion                                                             | Patients receive a preparative <b>non-myeloablative lymphodepletion regimen</b> that typically lasts for 5 - 7 days, which may be administered in the <b>inpatient</b> or <b>outpatient</b> setting at the discretion of the treating physician<br><br><b>Premedication:</b> Palonosetron, ondansetron, or granisetron or equivalent <b>CVC/PICC</b> line in place                                                                                                                                                                                                                                                                                                                                                                                                                                                                                            |
| M<br>O<br>N<br>I<br>T<br>O<br>R<br>I<br>N<br>G                                         | <b>Recommended Monitoring:</b><br>- <b>Vitals</b> every 4 hours<br>- <b>Pulse oximetry</b> every 8 hours<br>- <b>Telemetry monitoring</b><br>- <b>Strict intakes and outputs</b> every 8 hours<br>- <b>Neurologic</b> assessment every 8 h<br>- <b>Hematologic panel, complete metabolic panel, blood chemistry</b> before each dose, <b>serum creatinine</b><br>- <b>Electrocardiogram</b> if persistent tachycardia<br>- Daily weight monitoring                                                                                                                                                                                                                                                    | <b>Vital Sign Monitoring:</b><br>- Every <b>30 min during infusion</b> then <b>hourly (± 15 minutes) for 4 hours</b> , and <b>routinely (every 4–6 hours)</b> thereafter for up to ~24 hours post-TIL infusion (unless otherwise clinically indicated)<br>- Toxicities during the treatment period are typically due to non-myeloablative lymphodepletion and systemic IL-2 infusion<br>- TIL cell therapy is associated with a <b>low rate</b> of on- and off-target cell-mediated toxicity<br>- <b>CRS</b> and <b>ICANS</b> are not commonly observed with TIL cell therapy | <b>Cytopenias:</b><br>- Develop <b>during</b> and <b>immediately after</b> non-myeloablative lymphodepletion<br>- <b>Platelet</b> counts recover by 12–14 days<br>- <b>Lymphocyte</b> counts recover by 4–7 days<br>- <b>Neutrophil</b> counts recover by 6–14 days<br><br><b>Opportunistic Infections:</b><br>- Short- and long-term <b>antibiotic, antiviral, and anti-fungal</b> prophylaxis should be initiated<br><br><b>Fever:</b><br>- <b>Temperatures ≥38.0°C</b> should be screened for infection<br><br><b>Cyclophosphamide-induced urinary and renal toxicity:</b><br>- Urinary sediment should be checked regularly for <b>erythrocytes</b> or other signs of toxicity<br><br><b>GI toxicity:</b><br>- <b>Steroid use is prohibited</b> for GI symptoms<br>- Nausea, vomiting, diarrhea, abdominal pain, and stomatitis are common adverse events |
| M<br>A<br>N<br>A<br>G<br>E<br>M<br>E<br>N<br>T                                         | <b>Fevers/Chills/Rigors:</b><br>- <b>Acetaminophen</b> 650 mg by mouth every 4 hours<br>- <b>Indomethacin</b> 50–75 mg every 6 hours or equivalent<br>- <b>Meperidine</b> 25mg with option to repeat another dose within 30 mins as needed for rigors (25–50mg IV q4h PRN,)<br>- <b>Hydromorphone</b> 0.5 mg IV every 15 min as needed for rigors, may repeat × 3 total doses <sup>a</sup><br><b>Blood Pressure:</b>                                                                                                                                                                                                                                                                                  | <b>Infusion-related Reactions:</b><br>- Appropriate emergency medications (e.g., <b>epinephrine</b> and <b>diphenhydramine</b> ) should be available at bedside during infusion<br>- <b>Steroids</b> should only be administered in <b>life-threatening conditions</b><br><br><b>Uveitis (melanoma):</b>                                                                                                                                                                                                                                                                      | <b>Neutropenia:</b><br>- <b>Filgrastim</b> or biosimilar <b>5 µg/kg/day</b> subcutaneously daily (starting from Day 1) until neutropenia is resolved<br><br><b>Thrombocytopenia &amp; Anemia:</b><br>- Hemoglobin levels should be maintained <b>&gt;7.0 g/dL</b><br>- Platelet levels should be maintained <b>&gt;30,000/mm<sup>3</sup></b><br>- Administer <b>platelets</b> and <b>packed red blood cells</b> as needed                                                                                                                                                                                                                                                                                                                                                                                                                                     |

|                                         |                                                                                                                                                                                                                                                                                                                                                                                                                                                                                                                                                                                                                                                                                                                                                                                                                                                                                                                                                                                                                                                                                                                                                                                                                                                                                                                                                                                                                                                                                                                                                                                                                                                                                                                                                                                                                                                                                                                                                                                                                                                                                                                                                                                                                                                                                           |                                                                                                                                                                                                                                                                                                                                                               |                                                                                                                                                                                                                                                                                                                                                                                                                                                                                                                                                                                                                                                                                                                                                                                                                                                                                                                                                                                                                                                                                                                                            |
|-----------------------------------------|-------------------------------------------------------------------------------------------------------------------------------------------------------------------------------------------------------------------------------------------------------------------------------------------------------------------------------------------------------------------------------------------------------------------------------------------------------------------------------------------------------------------------------------------------------------------------------------------------------------------------------------------------------------------------------------------------------------------------------------------------------------------------------------------------------------------------------------------------------------------------------------------------------------------------------------------------------------------------------------------------------------------------------------------------------------------------------------------------------------------------------------------------------------------------------------------------------------------------------------------------------------------------------------------------------------------------------------------------------------------------------------------------------------------------------------------------------------------------------------------------------------------------------------------------------------------------------------------------------------------------------------------------------------------------------------------------------------------------------------------------------------------------------------------------------------------------------------------------------------------------------------------------------------------------------------------------------------------------------------------------------------------------------------------------------------------------------------------------------------------------------------------------------------------------------------------------------------------------------------------------------------------------------------------|---------------------------------------------------------------------------------------------------------------------------------------------------------------------------------------------------------------------------------------------------------------------------------------------------------------------------------------------------------------|--------------------------------------------------------------------------------------------------------------------------------------------------------------------------------------------------------------------------------------------------------------------------------------------------------------------------------------------------------------------------------------------------------------------------------------------------------------------------------------------------------------------------------------------------------------------------------------------------------------------------------------------------------------------------------------------------------------------------------------------------------------------------------------------------------------------------------------------------------------------------------------------------------------------------------------------------------------------------------------------------------------------------------------------------------------------------------------------------------------------------------------------|
| N<br>T<br><br>O<br>F<br><br>A<br>E<br>S | <ul style="list-style-type: none"> <li>- If not meeting target, administer <b>NS</b> or <b>LR</b> 250–500 mL IV bolus over 30–60 min (repeat 250mL IV bolus if needed)</li> <li><b>Urine Output:</b></li> <li>- Target urine output at least 0.5 mL/kg/h</li> <li>- If not meeting target, administer <b>NS</b> or <b>LR</b> 500 mL IV bolus over 30 minutes (repeat 500 mL IV bolus if &lt;50-80 mL/h)</li> <li>- If urine output is persistently low, stop IL2 and/or select centers consider <b>dopamine</b> at 2 µg/kg/min</li> <li><b>Pulmonary:</b></li> <li>- Initiate oxygen therapy if O<sub>2</sub> &lt;95% and hold/discontinue IL-2 if O<sub>2</sub> remains below 92% at time for next dose of IL-2</li> <li>- IV diuretics as needed</li> <li><b>Cardiovascular:</b></li> <li>- Sinus tachycardia &gt;130 beats/min sustained for 1 h during IL2</li> <li>- Assess telemetry/EKG for arrhythmias</li> <li>- Replace electrolytes as needed</li> <li><b>Gastrointestinal:</b></li> <li>- <b>Nausea/vomiting:</b> <b>ondansetron</b> 8 mg IV every 8 h 30 min prior to each dose</li> <li>- <b>Prochlorperazine</b> 10 g IV every 6 hours as needed, or <b>lorazepam</b> 0.5 mg IV every 6 hours as needed</li> <li>- <b>Loperamide</b> 2 mg every 2 hours as needed for diarrhea</li> <li>- <b>Diphenoxylate/atropine</b> 2 tablets by mouth every 6 hours as needed for diarrhea refractory to <b>loperamide</b></li> <li>- <b>GI Prophylaxis:</b> <b>Pantoprazole</b> 40 mg by mouth/IV daily or <b>famotidine</b> 20 mg PO/IV BID or equivalent</li> <li>- Steroid use is prohibited for prevention of gastrointestinal symptoms</li> <li><b>Dermatologic:</b></li> <li>- <b>Diphenhydramine</b> 25 mg PO every 6 h or <b>hydroxyzine</b> 10 mg PO every 6 h for itching</li> <li><b>Endocrine:</b></li> <li>- Hypothyroidism may need to be supplemented with <b>levothyroxine</b></li> <li><b>Hematologic:</b></li> <li>- <b>Anemia</b> – transfusion if Hgb ≤7 g/dL</li> <li>- <b>Thrombocytopenia</b> – transfusion if platelets &lt;10,000 mm<sup>3</sup></li> <li><b>Infections:</b></li> <li>- <b>Treat with appropriate antibiotic coverage as per institutional standards</b></li> <li><b>Edema/Capillary leak:</b></li> <li>- IV diuretics as needed</li> </ul> | <ul style="list-style-type: none"> <li>- <b>Topical corticosteroid</b> treatment (e.g., <b>betamethasone</b>, <b>dexamethasone</b>, <b>prednisolone</b>, etc.)</li> <li>-</li> <li><b>To Prevent Capillary Leak from IL2:</b></li> <li>- <b>Diuresis</b> is recommended, as needed and tolerated, to bring a patient back to near <b>euvolemia</b></li> </ul> | <ul style="list-style-type: none"> <li><b>Antibiotic Prophylaxis:</b></li> <li>- <b>Levofloxacin</b> or <b>ciprofloxacin</b> 500 mg orally daily or equivalent can be considered until <b>ANC</b> is &gt;500/mm<sup>3</sup></li> <li>- <b>TMP/SMX</b> 1 single/DS tablet orally 3x/week to prevent <b>pneumocystis</b> infection</li> <li><b>Antiviral Prophylaxis:</b></li> <li>- <b>Acyclovir</b> 400 mg or <b>valacyclovir</b> 500 mg orally BID or equivalent administered with chemotherapy</li> <li><b>Anti-fungal Prophylaxis:</b></li> <li>- <b>Fluconazole</b> 400 mg orally daily on day of TIL infusion and continue until <b>ANC</b> &gt;1000 mm<sup>3</sup></li> <li><b>Fever:</b></li> <li>- Broad-spectrum antibiotics for any <b>neutropenic fever</b>, <b>persistent hypotension</b>, or <b>oliguria</b></li> <li><b>Cyclophosphamide-induced urinary and renal toxicity:</b></li> <li>- <b>Hydration with forced diuresis</b></li> <li>- <b>Mesna</b> administered with cyclophosphamide depending upon dose of cyclophosphamide as per institutional standards to reduce risk of <b>hemorrhagic cystitis</b></li> </ul> |
|-----------------------------------------|-------------------------------------------------------------------------------------------------------------------------------------------------------------------------------------------------------------------------------------------------------------------------------------------------------------------------------------------------------------------------------------------------------------------------------------------------------------------------------------------------------------------------------------------------------------------------------------------------------------------------------------------------------------------------------------------------------------------------------------------------------------------------------------------------------------------------------------------------------------------------------------------------------------------------------------------------------------------------------------------------------------------------------------------------------------------------------------------------------------------------------------------------------------------------------------------------------------------------------------------------------------------------------------------------------------------------------------------------------------------------------------------------------------------------------------------------------------------------------------------------------------------------------------------------------------------------------------------------------------------------------------------------------------------------------------------------------------------------------------------------------------------------------------------------------------------------------------------------------------------------------------------------------------------------------------------------------------------------------------------------------------------------------------------------------------------------------------------------------------------------------------------------------------------------------------------------------------------------------------------------------------------------------------------|---------------------------------------------------------------------------------------------------------------------------------------------------------------------------------------------------------------------------------------------------------------------------------------------------------------------------------------------------------------|--------------------------------------------------------------------------------------------------------------------------------------------------------------------------------------------------------------------------------------------------------------------------------------------------------------------------------------------------------------------------------------------------------------------------------------------------------------------------------------------------------------------------------------------------------------------------------------------------------------------------------------------------------------------------------------------------------------------------------------------------------------------------------------------------------------------------------------------------------------------------------------------------------------------------------------------------------------------------------------------------------------------------------------------------------------------------------------------------------------------------------------------|

\*Either meperidine or hydromorphone is given initially depending on institutional protocol, and if refractory, then the other is administered.

AE, adverse event; ANC, absolute neutrophil count; BID, twice daily; CRS, cytokine release syndrome; CVC, central venous catheter; GI, gastrointestinal; Hgb, hemoglobin; ICANS, immune-effector cell-associated neurotoxicity syndrome; IL-2; interleukin 2; IV, intravenous; LR, lactated Ringer's; NS, normal saline; NSAID, nonsteroidal anti-inflammatory drug; PICC, peripherally inserted central catheter; PO, per oral (by mouth); PRN, pro re nata (take as needed), sCr, serum creatinine; TMP/SMX, trimethoprim/sulfamethoxazole.

Supplementary Figure 1. Steps in TIL cell therapy and patient journey

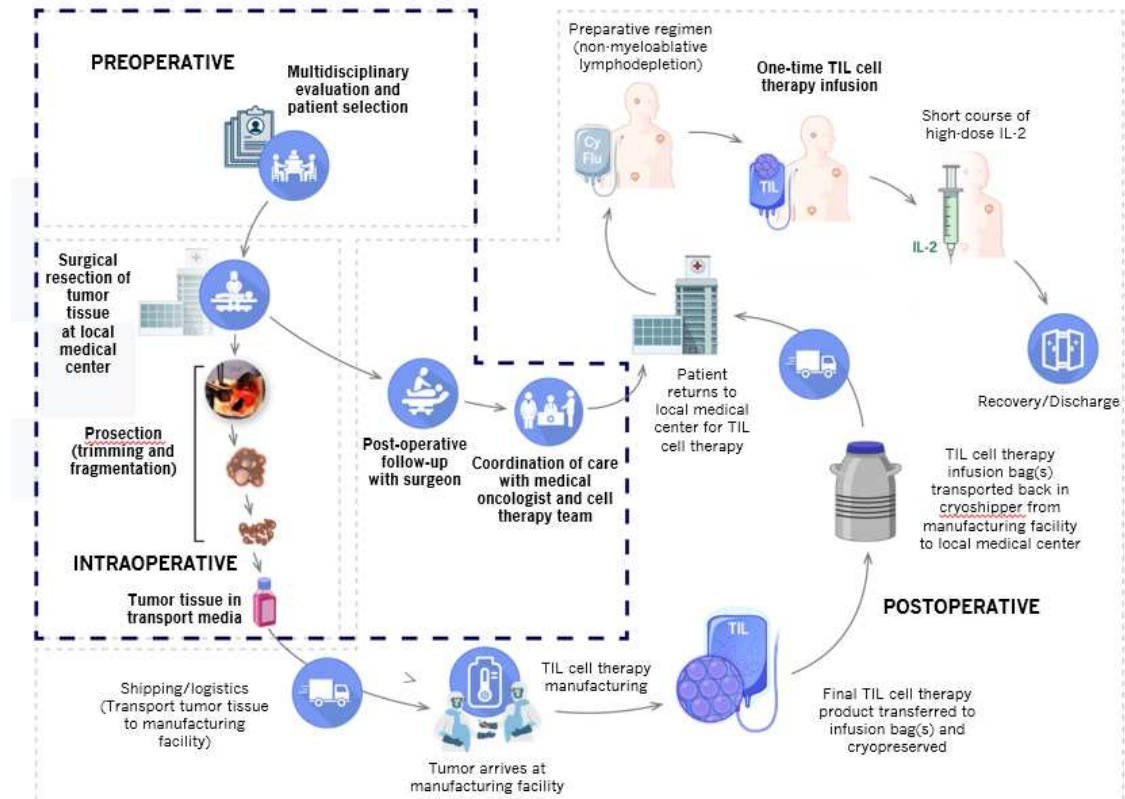

Reproduced with permission from Mullinax JE, et al. *Cancer J* 2022;28:285-93.  
 IL-2, interleukin 2; TIL, tumor-infiltrating lymphocyte.



**Supplementary Figure 2. Operational considerations for TIL cell therapy**

|                                            |                                                                                                                                                                                                                                                                                         |
|--------------------------------------------|-----------------------------------------------------------------------------------------------------------------------------------------------------------------------------------------------------------------------------------------------------------------------------------------|
| Streamlining patient selection and support | <ul style="list-style-type: none"> <li>•Patient education</li> <li>•Timely referral (coordination between the oncologist and surgeon)</li> <li>•Housing and supportive care considerations</li> <li>•Social work evaluation</li> </ul>                                                  |
| Institutional capacity and infrastructure  | <ul style="list-style-type: none"> <li>•Training and education of staff</li> <li>•Implementing infrastructure requirements</li> <li>•Optimizing processes and workflows</li> <li>•Assess reimbursement strategies</li> </ul>                                                            |
| Surgery                                    | <ul style="list-style-type: none"> <li>•Preferred tumor resection sites and best practices</li> <li>•Tumor samples that can be obtained with minimal morbidity</li> </ul>                                                                                                               |
| Shipping logistics                         | <ul style="list-style-type: none"> <li>•Precise scheduling</li> <li>•Temperature control</li> <li>•Courier efficiency</li> </ul>                                                                                                                                                        |
| Nursing support                            | <ul style="list-style-type: none"> <li>•Nurse navigator and nursing staff</li> <li>•Education programs and training</li> <li>•Guidelines for dosing, safety mitigation strategies, emergencies, and care escalation</li> </ul>                                                          |
| Pharmacy support                           | <ul style="list-style-type: none"> <li>•Order set creation for non-myeloablative lymphodepleting regimen and IL-2 administration</li> <li>•TIL product preparation and infusion</li> <li>•Patient, caregiver, and staff education</li> <li>•Pharmacovigilance and monitoring</li> </ul> |
| Cell Therapy Lab                           | <ul style="list-style-type: none"> <li>•Possibly TIL manufacturing</li> <li>•Processing and storage of tumor tissue, process development, lot release testing, and quality control</li> <li>•Thawing and delivery to bedside</li> </ul>                                                 |
| Manufacturing                              | <ul style="list-style-type: none"> <li>•Automation, standardization of processes, and environmental control</li> </ul>                                                                                                                                                                  |
| Data/electronic medical record management  | <ul style="list-style-type: none"> <li>•Defining entities responsible for data platform creation, ensuring accuracy of data collection, logistical challenges of long-term tracking, and funding requirements</li> <li>•Establishing electronic medical record workflows</li> </ul>     |

IL-2, interleukin 2; TIL, tumor-infiltrating lymphocyte.
